# Supplementary material
Source: PubMed Central journal article supplement (PMC1087715)

**A**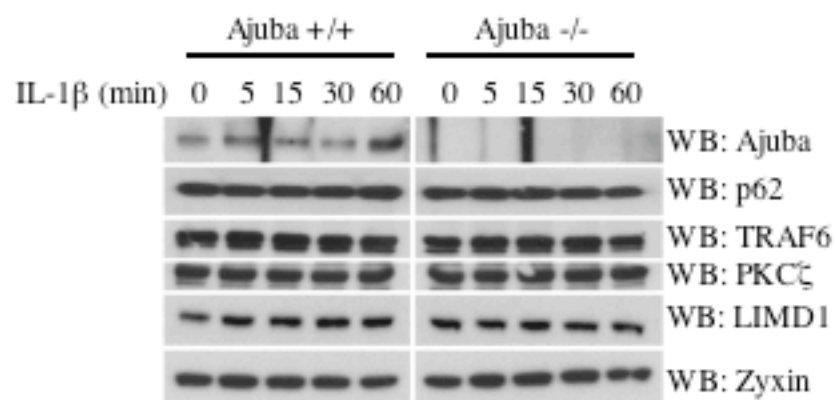**B**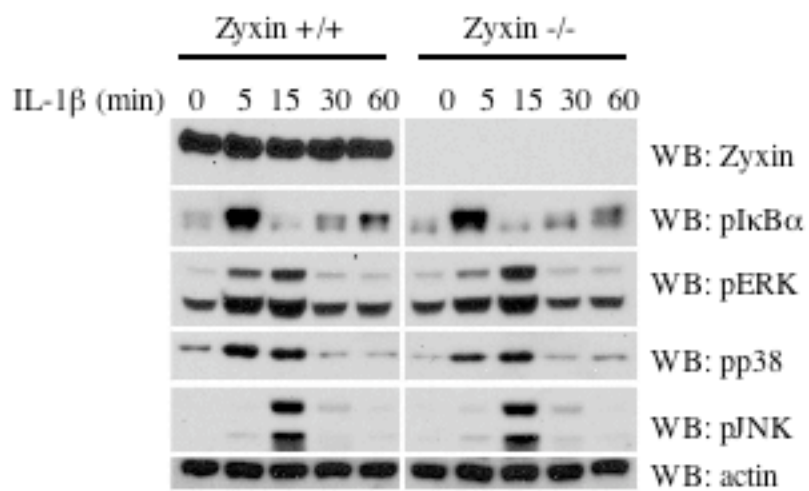

Supplement: molcellb_25_10_4010__1.pdf [file molcellb_25_10_4010__1.pdf]
